# Supplementary material for: In situ cleavage and rearrangement synthesis of an easy-to-obtain and highly stable Cu(ii)-based MOF for efficient heterogeneous catalysis of carbon dioxide conversion
Source: Royal Society of Chemistry journal article supplement (doi:10.1039/d1ce00888a), 2021-01-01
Supplement: d1ce00888a1.pdf [file d1ce00888a1.pdf]

## Supporting Information

### **In-situ cleavage and rearrangement synthesis of an easy-obtained and high stable Cu(II)-based MOF for efficient heterogeneous catalysis of carbon dioxide conversion**

**Lan Qin,<sup>a</sup> Yu Pan,<sup>a</sup> Lei Yu,<sup>b</sup> Ranran Huai,<sup>a</sup> Lu Yang,<sup>a\*</sup> Yong Dou,<sup>a</sup> Zhen Zhou<sup>a\*</sup>**

[a] Shandong University of Technology, School of Chemistry and Chemical Engineering, Zibo, 255000, P. R. China.

[b] Jiaxing University, School of Entrepreneurship, Jiaxing, 330400, P. R. China.

Correspondence email: [yanglu@sdut.edu.cn](mailto:yanglu@sdut.edu.cn); [zhouzhen@sdut.edu.cn](mailto:zhouzhen@sdut.edu.cn)

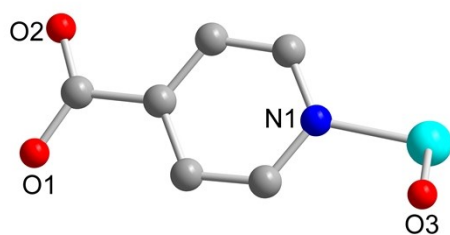

**Figure S1** Asymmetric unit of **1**. Selective bond distance (Å) and angle (°) in **1**. Cu(1)-O(1) 1.940(4), Cu(1)-O(2) 1.945(4), Cu(1)-O(3) 2.296(5), Cu(1)-N(1) 2.018(5), O(1)-Cu(1)-O(2) 175.36(19), O(1)-Cu(1)-N(1) 92.1(2), O(2)-Cu(1)-N(1) 90.3(2), O(1)-Cu(1)-O3(1) 91.28(17), O(2)-Cu(1)-O(3) 84.56(17).

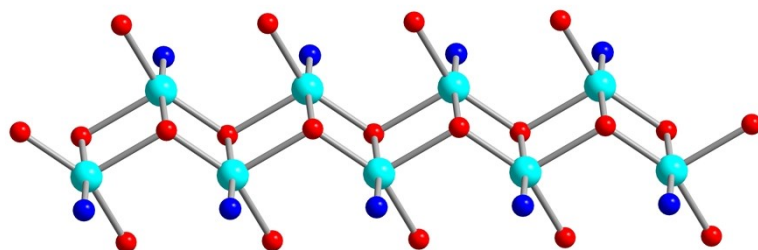

**Figure S2** The coordination environment and connected mode of Cu chains.

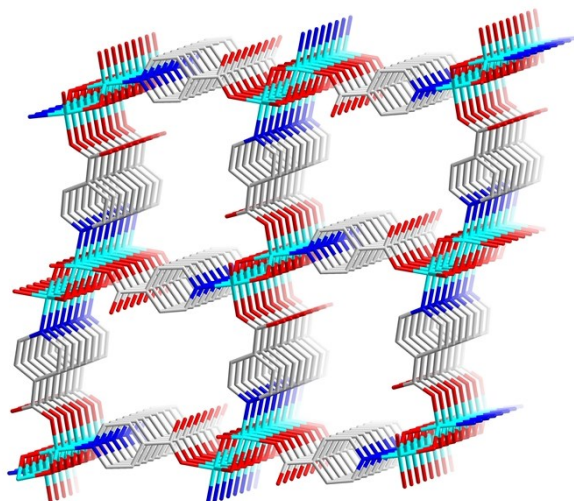

**Figure S3** Structure of **1** showing the three-dimensional frameworks with one-dimensional channels.

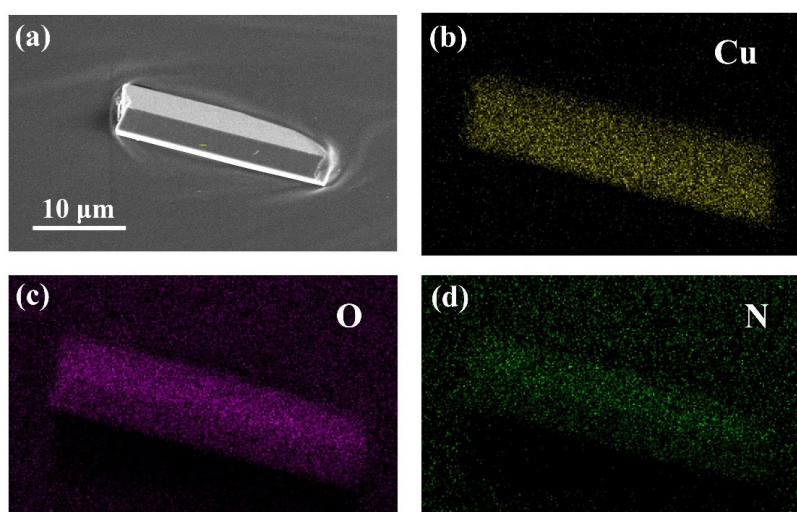

**Figure S4** (a) The SEM image of **1**; (b-d) the element mapping image of **1** for Cu, O, and N, respectively.

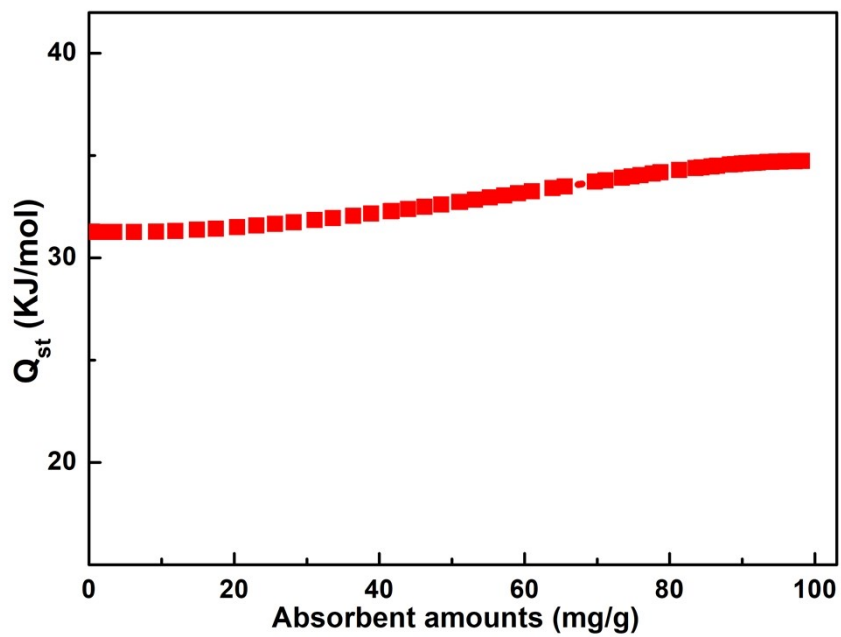

Figure S5 Isosteric adsorption enthalpy of CO<sub>2</sub> on 1.

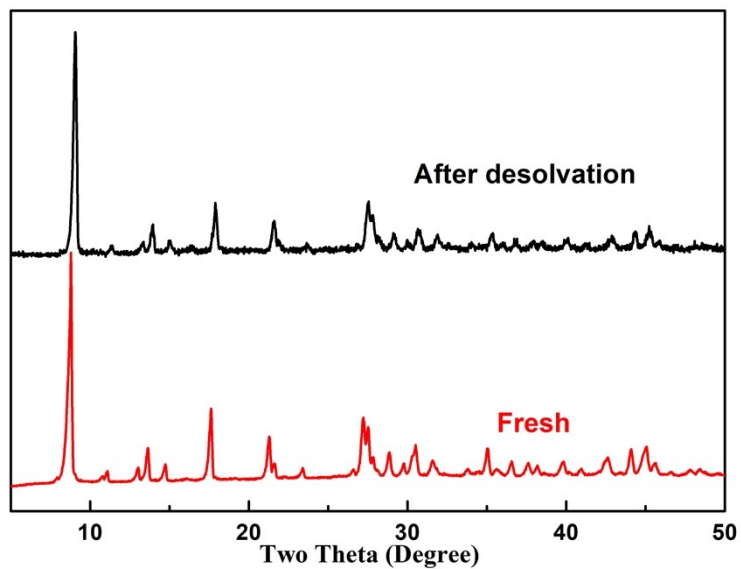

Figure S6 PXRD patterns of fresh 1 (red) and after desolvation (black).

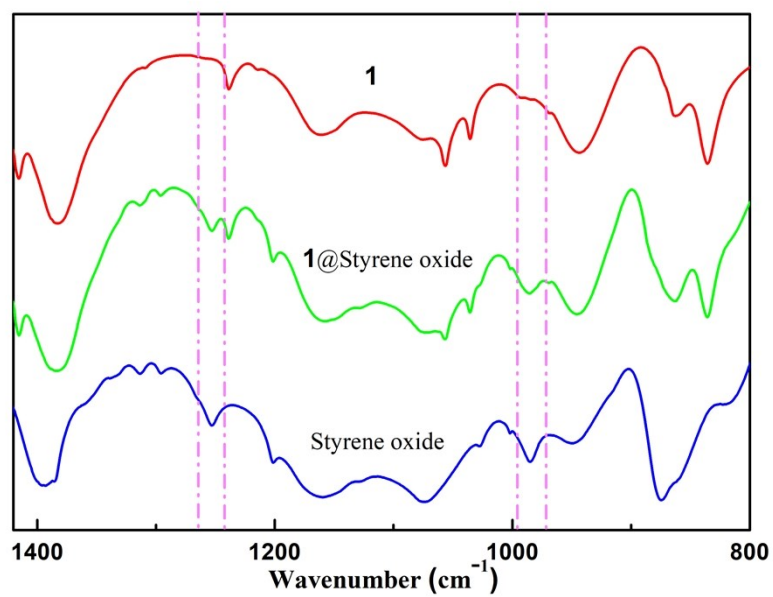

**Figure S7.** Comparisons of FT-IR spectra of **1**, **1** after immersed in styrene oxide and free styrene oxide.

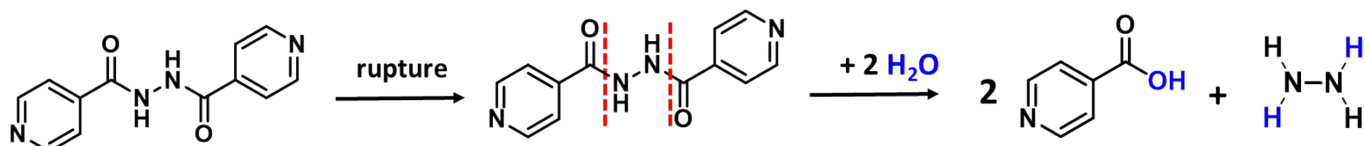

**Scheme S1.** Proposed cleavage and rearrangement process of the ligand *N,N'*-bis(4-picolinoyl)hydrazine into isonicotinate moiety.

**Table S1.** Comparisons of CO<sub>2</sub> cycloaddition catalysis based on Cu-MOFs heterogeneous catalysts.

| Entry | MOF       | Amount<br>MOF / TBABr | T / °C | P / atm | t / h | Yield / % | Ref.             |
|-------|-----------|-----------------------|--------|---------|-------|-----------|------------------|
| 1     | Cu-NTTA   | 5 μmol / 1.5 mol%     | 100    | 10      | 8     | 56.3      | 39               |
| 2     | Cu-MOF    | 2 μmol / 1.5 mol%     | 100    | 10      | 12    | >99       | 40               |
| 3     | JLU-Liu20 | 0.25 mol% / 5 mol%    | 80     | 1       | 48    | 72        | 41               |
| 4     | Cu(TPA)   | 5 wt% / 5 mol%        | 70     | 1       | 10    | 93        | 42               |
| 5     | Cu-MOF    | 0.4 mol% / 0.2 mol%   | 70     | 1       | 16    | 90        | 43               |
| 6     | <b>1</b>  | 5 mol% / 0.5 mol%     | 100    | 5       | 12    | >99       | <b>This work</b> |

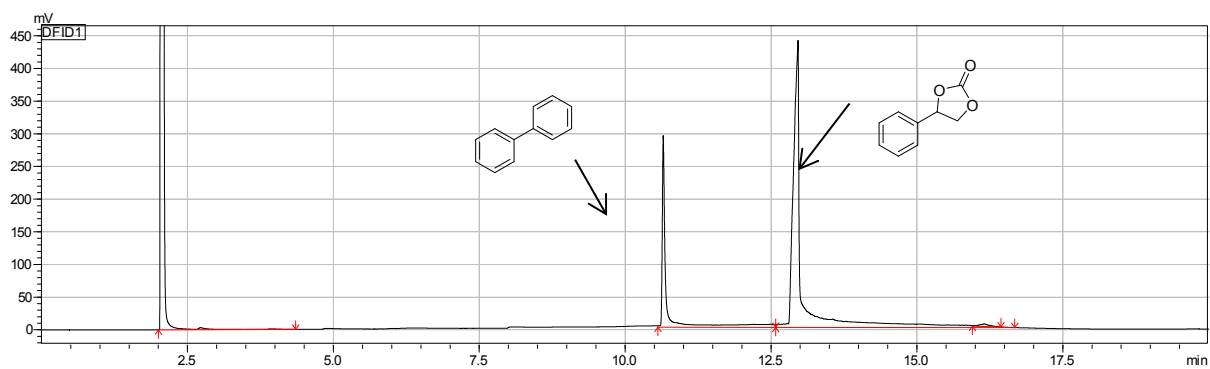

**Figure S8** GC spectrum of cycloaddition product **1b**.

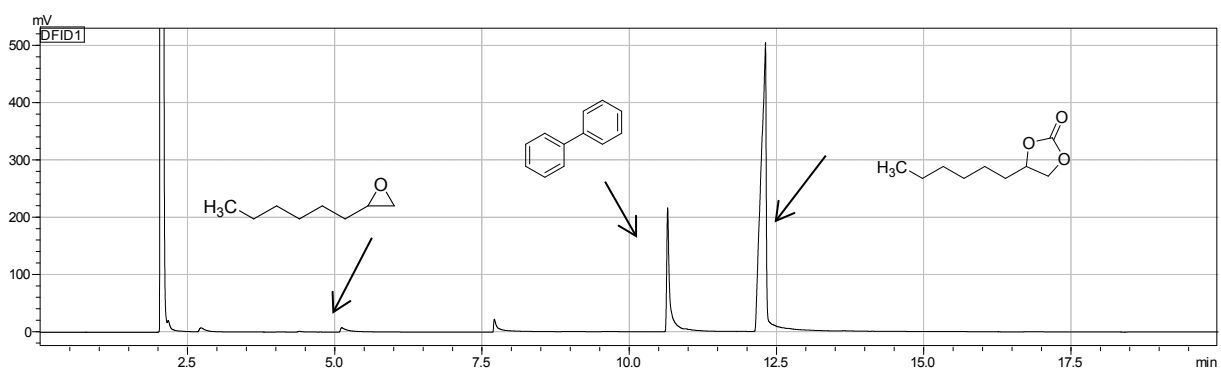

**Figure S9** GC spectrum of cycloaddition product **2b**.

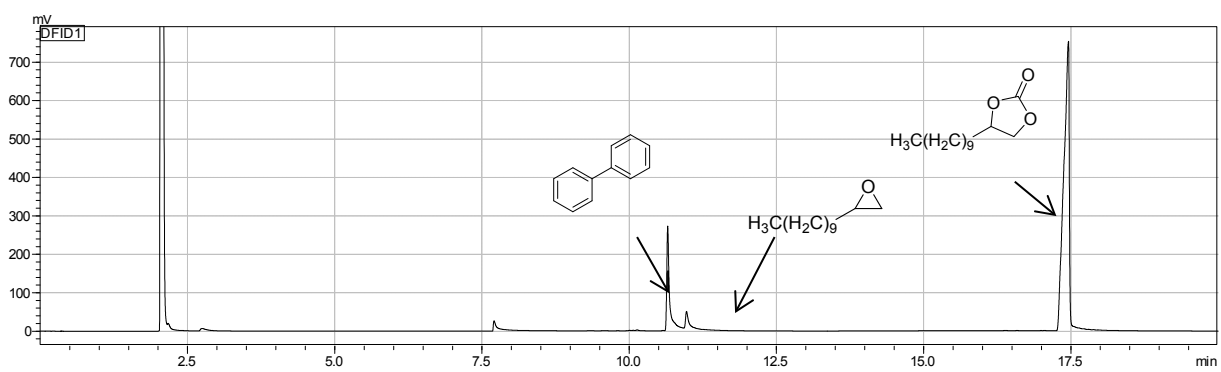

**Figure S10** GC spectrum of cycloaddition product **3b**.

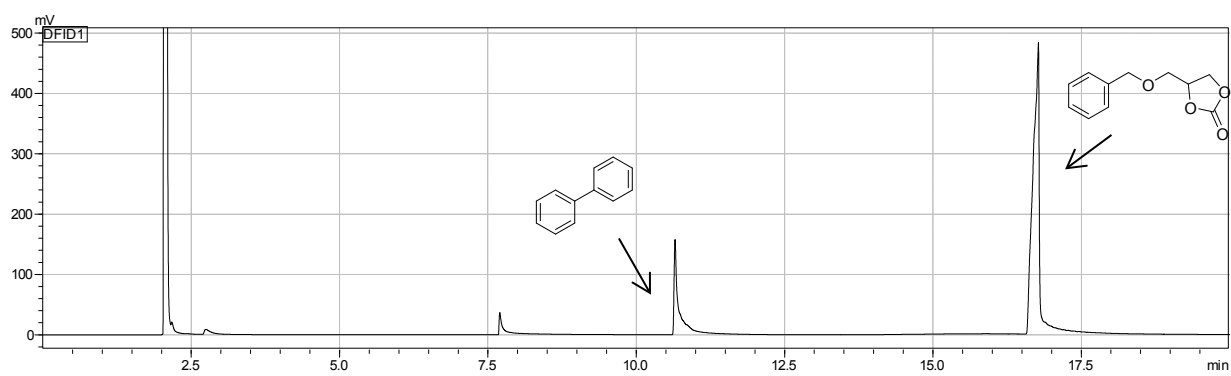

**Figure S11** GC spectrum of cycloaddition product **4b**.

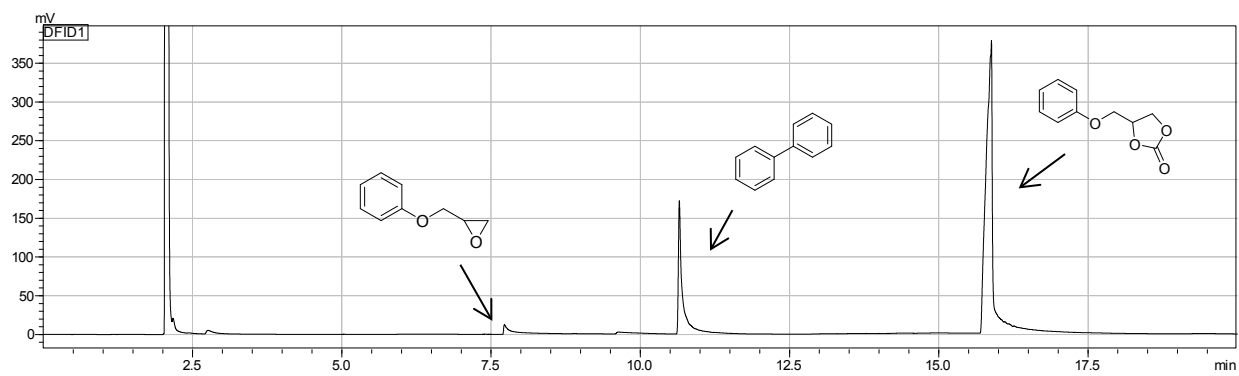

**Figure S12** GC spectrum of cycloaddition product **5b**.
